# Supplementary material for: Improving the interfacial stability of ultrahigh-nickel cathodes with PEO-based electrolytes by targeted chemical reactions
Source: Royal Society of Chemistry journal article supplement (doi:10.1039/d4sc02809k), 2024-01-01
Supplement: d4sc02809k1.pdf [file d4sc02809k1.pdf]

## Improving the Interfacial Stability of Ultrahigh-Nickel Cathode with PEO-based Electrolyte by Targeted Chemical Reactions

Yuqing Dai,<sup>a</sup> Zihan Hou,<sup>a</sup> Gui Luo,<sup>b</sup> Duo Deng,<sup>b</sup> Wenjie Peng,<sup>a,b,c</sup> Zhixing Wang,<sup>a,c</sup> Huajun Guo,<sup>a,c</sup> Xinhai Li,<sup>a,c</sup> Guochun Yan,<sup>a,c</sup> Hui Duan,<sup>a,c</sup> Wenchao Zhang<sup>a,c</sup> and Jiexi Wang\*<sup>a,c</sup>

[a] Engineering Research Center of the Ministry of Education for Advanced Battery Materials, Hunan Provincial Key Laboratory of Nonferrous Value-Added Metallurgy, School of Metallurgy and Environment, Central South University, Changsha 410083, China. E-mail: wangjiexikeen@csu.edu.cn

[b] BASF ShanShan Battery Material Co., LTD, Changsha 410205, China.

[c] National Engineering Research Centre of Advanced Energy Storage Materials, changsha 410205, China

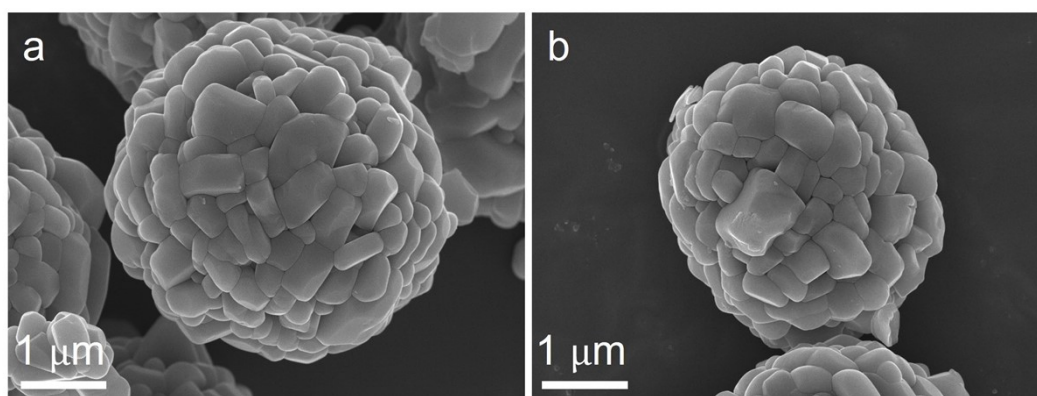

Fig. S1. SEM images of (a) LBO2-NCM and (b) LBO3-NCM.

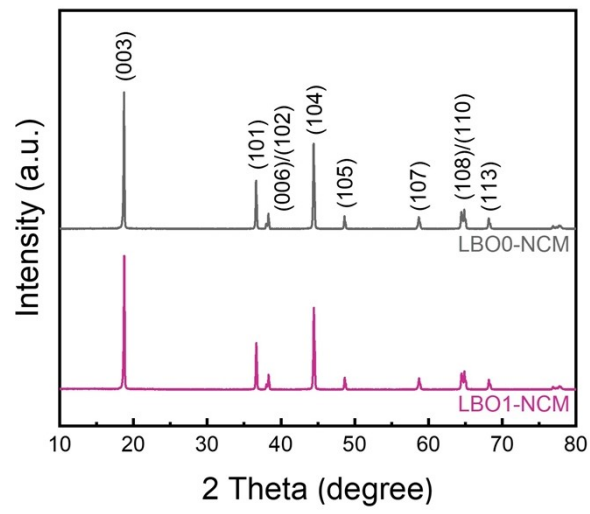

Fig. S2. XRD patterns of LBO0-NCM and LBO1-NCM.

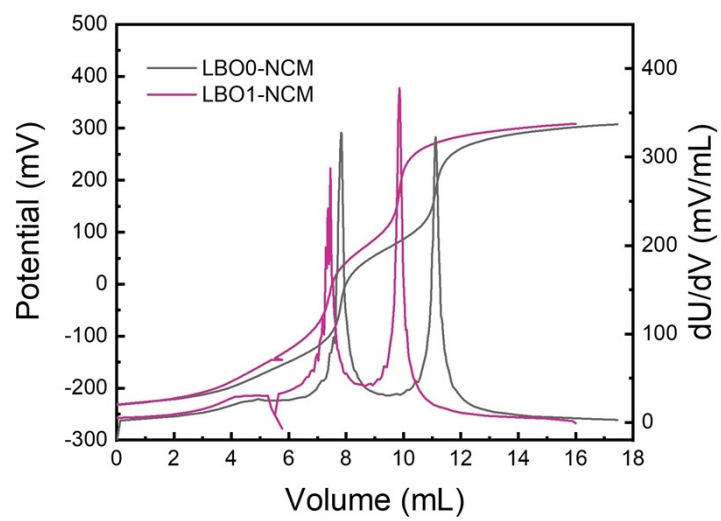

Fig. S3. Electrometric titration curve of LBO0-NCM and LBO1-NCM.

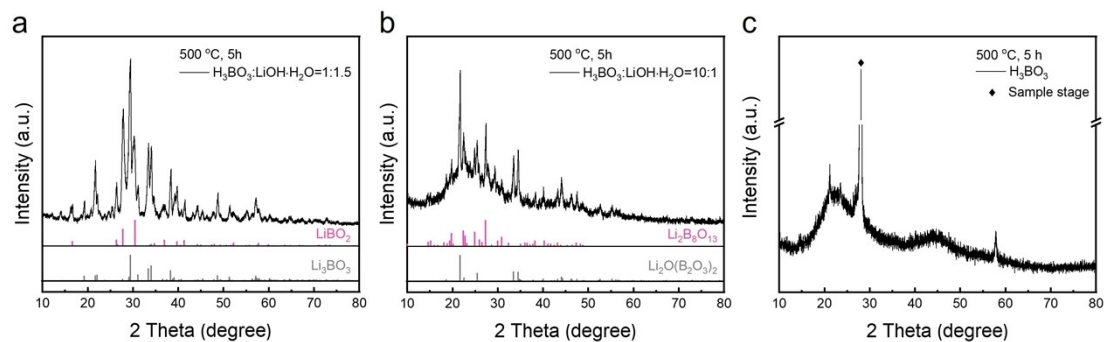

Fig. S4. XRD patterns of samples sintered with different mole ratio of  $\text{H}_3\text{BO}_3$  and  $\text{LiOH} \cdot \text{H}_2\text{O}$ .

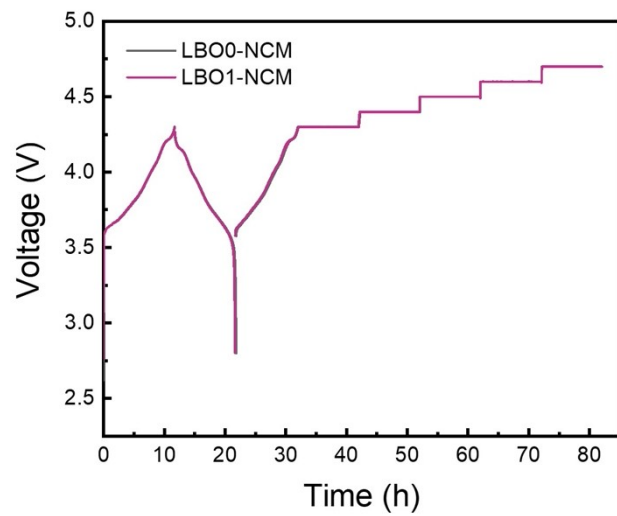

Fig. S5. The voltage curve of the three-electrode PEO-based SLMB during the measuring procedure of this study.

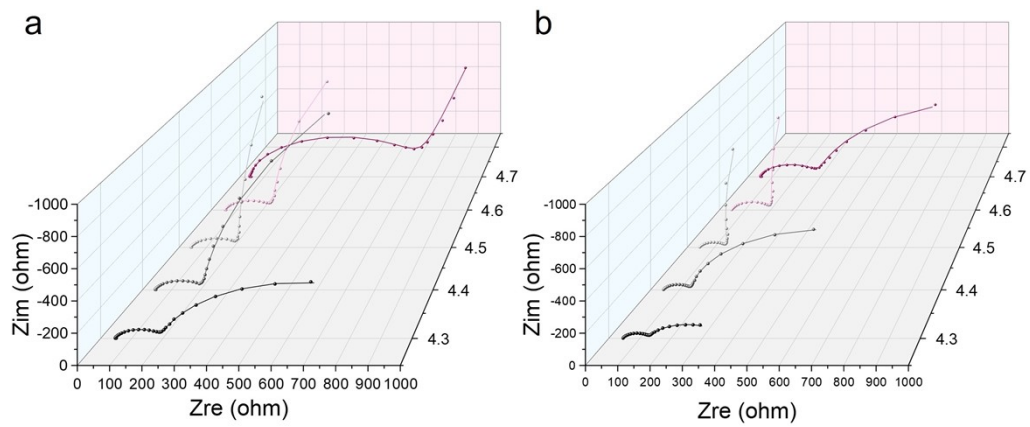

Fig. S6. The Nyquist plots of the three-electrode (a) Li|PEO|LBO0-NCM and (b) Li|PEO|LBO1-NCM.

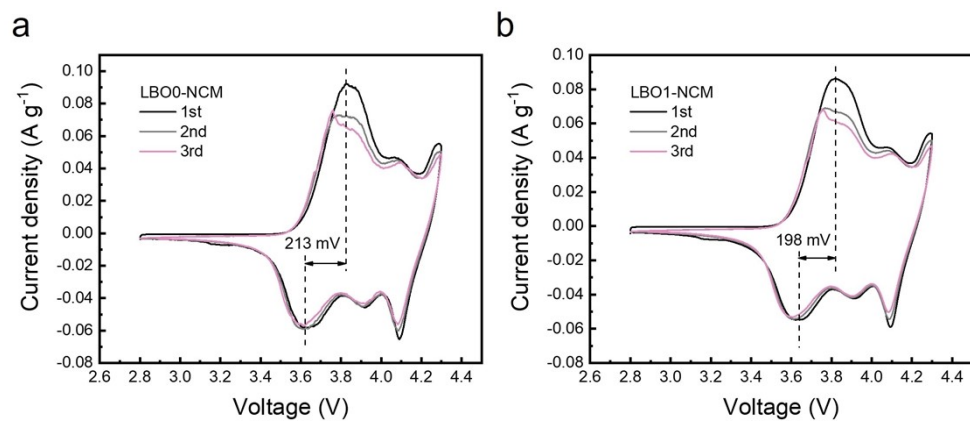

Fig. S7. CV curves of the pristine (a) LBO0-NCM and (b) LBO1-NCM in the first three consecutive cycles between 2.8-4.3 V with a scanning rate of 0.05 mV s<sup>-1</sup>.

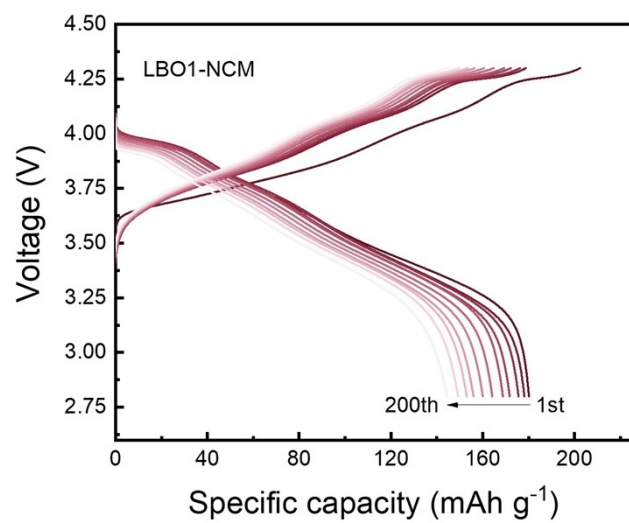

Fig. S8. Corresponding charge/discharge curves of Li|PEO|LBO1-NCM pouch cell at different electrochemical cycles.



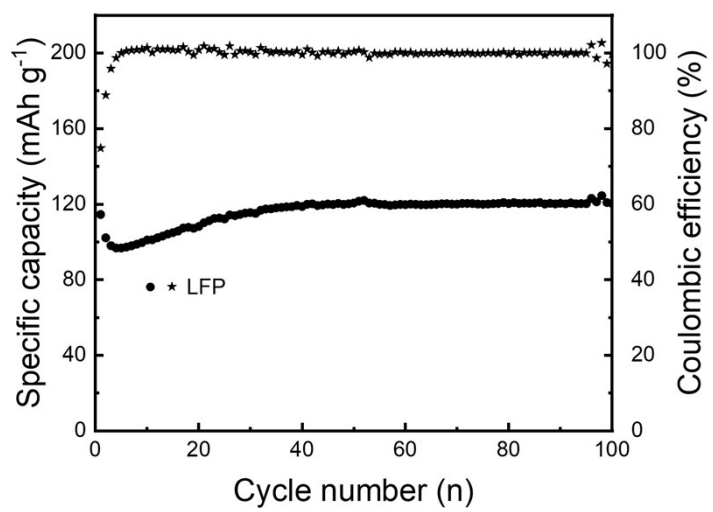

Fig. S9. Cycling performance and the corresponding Coulombic efficiency at 0.5C of Li|PEO|LFP.

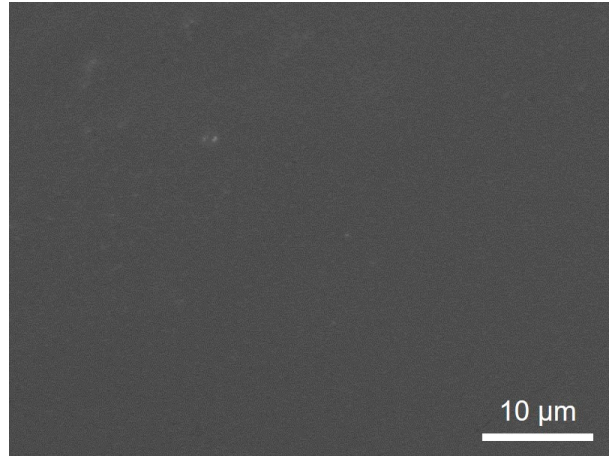

Fig. S10. The SEM images of the disassembled-lithium metal after 100 cycles in Li|PEO|LFP.
